# Supplementary material for: Association of GLIM-Defined Malnutrition in Kidney Dysfunction With Increased All-Cause Mortality from Infections in Hospitalized Older Adults: A Retrospective Cohort Study
Source: Preprints.org preprint supplement (doi:10.20944/preprints202312.0436.v1), 2023-12-07
Supplement: Supplementary file 1 [file supplementary]

**Table S1.** Predictors of mortality

|  | Univariate model | |  | Multivariate model | |
| --- | --- | --- | --- | --- | --- |
|  | HR (95% CI) | *P* value |  | HR (95% CI) | *P* value |
| Age (per 1 year) | 1.06 (1.04-1.07) | <0.001 |  | 1.05 (1.03-1.06) | <0.001 |
| Male sex (vs. female sex) | 1.23 (0.96-1.57) | 0.103 |  | 1.50 (1.16-1.94) | 0.002 |
| eGFR level |  |  |  |  |  |
| eGFR≥60 | Reference |  |  | Reference |  |
| eGFR 30-59 | 1.48 (1.09-2.00) | 0.011 |  | 1.51 (1.11-2.05) | 0.008 |
| eGFR<30 | 2.88 (2.19-3.80) | <0.001 |  | 3.04 (2.28-4.04) | <0.001 |
| Comorbidities |  |  |  |  |  |
| Diabetes mellitus***** | 1.53 (1.20-1.97) | <0.001 |  | 1.40 (1.06-1.85) | 0.018 |
| COPD***** | 2.95 (1.85-4.71) | <0.001 |  | 2.93 (1.79-4.79) | <0.001 |
| Autoimmune disorders | 0.67 (0.39-1.14) | 0.142 |  | 0.93 (0.47-1.81) | 0.826 |
| Cardiovascular disease | 1.05 (0.62-1.77) | 0.854 |  | 1.36 (0.96-1.94) | 0.087 |
| Malignancy | 0.73 (0.37-1.42) | 0.351 |  | 1.80 (1.13-2.88) | <0.001 |
| GLIM nutrition status |  |  |  |  |  |
| Without malnutrition | Reference |  |  | Reference |  |
| Malnutrition (moderate) | 1.95 (1.42–2.68) | <0.001 |  | 1.76 (1.28-2.42) | <0.001 |
| Malnutrition (severe) | 2.97 (2.20–4.03) | <0.001 |  | 2.44 (1.78-3.33) | <0.001 |

HR, hazard ratio; CI, confidence interval; vs., versus

Data are presented as the HR, 95% CI, and *P* value from Cox proportional hazard regression analyses.

“eGFR≥60” , and ”without malnutrition" was used as the reference category.

Data are adjusted for baseline characteristics including age, sex, eGFR categories, comorbidities (chronic obstructive pulmonary disease, autoimmune disease, malignancy, diabetes mellitus, and cardiovascular disease), and GLIM nutritional status.
